# Supplementary material for: Improving the Cryotolerance of Wine Yeast by Interspecific Hybridization in the Genus Saccharomyces
Source: Front Microbiol. 2019 Jan 8;9:3232. doi: 10.3389/fmicb.2018.03232 (PMC6331415; doi:10.3389/fmicb.2018.03232)
Supplement: Supplementary file 1 [file Table_1.XLSX]

## Sheet: Table S1
Table S1. Yeast strains used in this study
Species	Code	Industrial/Collection Name	Source	Origin	Identification	References
Saccharomyces cerevisiae	ADY1	QA23	Lallemand	Vinhos Verdes, Portugal
Saccharomyces cerevisiae	ADY2	ICV GRE	Lallemand	Cornas, Rhone Valley, France
Saccharomyces cerevisiae	ADY3	T73	Lallemand	Valencia, Spain
Saccharomyces cerevisiae	ADY4	EXENCE	Lallemand	Stellenbosch University, South Africa
Saccharomyces cerevisiae	ADY5	CROSS EVOLUTION	Lallemand	Stellenbosch University, South Africa
Saccharomyces uvarum	ADY6	BMV58	Lallemand	Valencia, Spain
Saccharomyces cerevisiae	ADY7	OKAY	Lallemand	Montpellier, France
Saccharomyces cerevisiae	ADY8	2056	Lallemand	Rhone Valley, France
Saccharomyces cerevisiae	ADY9	43	Lallemand	Rhone Valley, France
Saccharomyces cerevisiae	ADY10	D80	Lallemand	Rhone Valley, France
Saccharomyces cerevisiae	ADY11	CLOS	Lallemand	Priorat region, Tarragona, Spain
Saccharomyces cerevisiae	ADY12	BDX	Lallemand	Rhone Valley, France
Saccharomyces cerevisiae	ADY13	D47	Lallemand	Rhone Valley, France
Metschnikowia pulcherrima#	ADY14	FLAVIA	Lallemand	Santiago de Chile, Chile
Torulaspora delbrueckii	ADY15	BIODIVA	Lallemand	Rhone Valley, France
Saccharomyces cerevisiae	ADY16	CY3079	Lallemand	Bourgogne, France
Saccharomyces cerevisiae	ADY17	D254	Lallemand	Rhone Valley, France
Saccharomyces cerevisiae	ADY18	71B	Lallemand	Narbonne, France*
Saccharomyces cerevisiae	ADY19	HPS	Lallemand	CSIC, Spain
Saccharomyces cerevisiae	ADY20	Uvaferm WAM	Lallemand	Palencia, Spain
Saccharomyces cerevisiae	ADY21	Lalvin Rhone2226	Lallemand	Rhone Valley, France
Saccharomyces cerevisiae	ADY22	Uvaferm CEG	Lallemand	Geisenheim Research Station, Germany
Saccharomyces cerevisiae	ADY23	P23	Lallemand
Saccharomyces cerevisiae	ADY24	EC1118	Lallemand	Champagne region, France
Saccharomyces cerevisiae	ADY25	P27	Lallemand
Saccharomyces uvarum	ADY26	12600	Spanish Type Culture Collection
Saccharomyces kudriavzevii	ADY27	CR85	Amparo Querol collection	Querqus, Ciudad Real, Spain	PCR-RFLP 5.8S-ITS region; D1-D2 sequencing	Lopes et al.,(2010)
Saccharomyces kudriavzevii	ADY28	CR90	Amparo Querol collection	Querqus, Ciudad Real, Spain	PCR-RFLP 5.8S-ITS region; D1-D2 sequencing	Lopes et al.,(2010)
Saccharomyces cerevisiae	ADY29	PE2	LNF-Latino Americana	Fermentation
Saccharomyces cerevisiae	ADY30	L5	Lallemand
Saccharomyces cerevisiae	ADY31	CEN.PK113-7D	Lab	Euroscarf
Metschnikowia pulcherrima#	ADY32	CECT1961	Spanish Type Culture Collection	CECT
Metschnikowia pulcherrima#	ADY33	V Ti 2	Amparo Querol collection	Vineyard, Valencia, Spain	PCR-RFLP 5.8S-ITS region; D1-D2 sequencing
Metschnikowia pulcherrima#	ADY34	V Ti 3	Amparo Querol collection	Vineyard, Valencia, Spain	PCR-RFLP 5.8S-ITS region; D1-D2 sequencing
Torulaspora delbrueckii	ADY35	9	Amparo Querol collection	Mezcal, Mexico	PCR-RFLP 5.8S-ITS region
Torulaspora delbrueckii	ADY36	M15-1	Amparo Querol collection	Raw sweet potato, Peru	PCR-RFLP 5.8S-ITS region
Torulaspora delbrueckii	ADY37	Chr 71.1	Amparo Querol collection	Forest floor, Hungary	PCR-RFLP 5.8S-ITS region; D1-D2 sequencing	Lopes et al.,(2010)
Kluyveromyces marxianus	ADY38	CECT1442	Spanish Type Culture Collection	CECT
Kluyveromyces marxianus	ADY39	Chuy 3	Amparo Querol collection	Mezcal, Mexico	PCR-RFLP 5.8S-ITS region
Kluyveromyces marxianus	ADY40	Chuy 269	Amparo Querol collection	Mezcal, Mexico	PCR-RFLP 5.8S-ITS region
Kluyveromyces thermotolerans	ADY41	CECT12816	Spanish Type Culture Collection	CECT
Kluyveromyces thermotolerans	ADY42	R Ag 1	Amparo Querol collection	Querqus, Ciudad Real, Spain	PCR-RFLP 5.8S-ITS region
Saccharomyces cerevisiae	ADY43	1 LM	Amparo Querol collection	Chicha de Jora, Peru	PCR-RFLP 5.8S-ITS region
Saccharomyces cerevisiae	ADY44	LA. 4M	Amparo Querol collection	Masato, Peru	PCR-RFLP 5.8S-ITS region
Saccharomyces cerevisiae	ADY45	Ch3 BL2	Amparo Querol collection	Chicha de Jora, Peru	PCR-RFLP 5.8S-ITS region
Saccharomyces cerevisiae	ADY46	CH1 L1	Amparo Querol collection	Chicha de Jora, Peru	PCR-RFLP 5.8S-ITS region
Saccharomyces cerevisiae	ADY47	LB m.1	Amparo Querol collection	Masato, Peru	PCR-RFLP 5.8S-ITS region
Saccharomyces cerevisiae	ADY48	14L5	Amparo Querol collection	Tenerife, Spain	PCR-RFLP 5.8S-ITS region
Saccharomyces cerevisiae	ADY49	ScI GAL01	Amparo Querol collection	Olive,Manzanilla-Aloreña,Spain	PCR-RFLP 5.8S-ITS region
Saccharomyces cerevisiae	ADY50	I.CF 14	Amparo Querol collection	Mecsekalja vineregion,Hungary	Restriction of APM3, GSY1, PPR1, CYR1, EGT2,BRE5	Kindly provided by M. Sipiczki
Saccharomyces cerevisiae	ADY51	Chr 9	Amparo Querol collection	Forest floor, Hungary	PCR-RFLP 5.8S-ITS region; D1-D2 sequencing	Lopes et al.,(2010)
Saccharomyces cerevisiae	ADY52	Chr 96.2	Amparo Querol collection	Querqus faginea, Castellon, Spain	PCR-RFLP 5.8S-ITS region; D1-D2 sequencing	Lopes et al.,(2010)
Saccharomyces cerevisiae	ADY53	CECT10094	Spanish Type Culture Collection	CECT
Saccharomyces kudriavzevii	ADY54	R Te 3	Amparo Querol collection	Querqus, Teruel, Spain	PCR-RFLP 5.8S-ITS region
Saccharomyces kudriavzevii	ADY55	R Ag 1_3	Amparo Querol collection	Querqus, Ciudad Real, Spain	PCR-RFLP 5.8S-ITS region	Kindly provided by M. Sipiczki
Saccharomyces uvarum	ADY56	III.CF 20.t.2	Amparo Querol collection	Mecsekalja vineregion, Hungary	Restriction of APM3, GSY1, PPR1, CYR1, EGT2, BRE5	Kindly provided by M. Sipiczki
Saccharomyces uvarum	ADY57	I.KM13	Amparo Querol collection	Tokaj vineregion, Hungary	Restriction of APM3, GSY1, PPR1, CYR1, EGT2, BRE5
Saccharomyces eubayanus	ADY58	NPCC1292	North Patagonian Culture Collection (NPCC)	Araucaria araucana, Patagonia, Argentina		Rodríguez et al., (2014), (2017)
Saccharomyces uvarum	ADY59	NPCC1314	North Patagonian Culture Collection (NPCC)	Apple Chicha, Patagonia, Argentina		Rodríguez et al., (2014), (2017)
*isolated by the INRA (National Agricultural Research Institute) in Narbonne
# Metschnikowia aff. pulcherrima. Altlhough these strains were identified as M. pulcherrima, recent publications (Sipiczki et al., 2018) have questioned the suitability of the D1/D2 domains and the ITS spacers for species adscription as consequence of the high degree of polymorhic intraspecific sequences
